# Supplementary material
Source: publisher site journal article supplement (https://cdn.jamanetwork.com/ama/content_public/journal/neur/934568/noi150041supp1_prod.pdf)
Supplement: Supplementary file 1 [file noi150041supp1_prod.pdf]

## Supplementary Online Content

Huisman MHB, Seelen M, van Doormaal PTC, et al. Effect of presymptomatic body mass index and consumption of fat and alcohol on amyotrophic lateral sclerosis. *JAMA Neurol*. Published online August 17, 2015. doi:10.1001/jamaneurol.2015.1584.

**eMethods.** Design of the Food Frequency Questionnaire (FFQ)

**eFigure 1.** Relation Between Risk of ALS and Quintiles of Nutrient Intake

**eFigure 2.** Relation Between Risk of ALS and Quintiles of Alcohol Intake, Adjusted for Intake of Red Wine

**eTable.** Relation Between Nutrient Intake and Survival

This supplementary material has been provided by the authors to give readers additional information about their work.

## **eMethods. Design of the Food Frequency Questionnaire (FFQ)**

Food items for the original questionnaire were chosen on the basis of data from the Dutch National Food Consumption Survey of 1992<sup>1</sup>, and updated based on a 1998 survey.<sup>2</sup> The selected food items for this FFQ covered about 95% of the intake of total energy, total fat, fatty acids and cholesterol of the Dutch population and was validated for this purpose.<sup>3</sup> Considering the hypotheses of the present study, the questionnaire was extended with questions on the intake of foods which contributed > 0.5% to the population intake of protein, carbohydrates, dietary fibres, alcohol, calcium, vitamin B2, vitamin C, vitamin E, lycopene, flavonoids, glutamate and phyto-oestrogens. For several food items, additional questions were included on preparation method or portion sizes. Consumed amounts were calculated using standard household measures.<sup>4</sup> For nutrient calculations, the 2006 Dutch Food Composition Table was used for energy, macronutrients and vitamin C<sup>5</sup>; national reports by TNO Nutrition and Food Research for calcium, vitamin B2 and vitamin E; publications for flavonoids<sup>6,7</sup>; the US Department of Agriculture table for phyto-oestrogens (isoflavones)<sup>8</sup>; publications for glutamate and monosodium glutamate<sup>9-13</sup>; and the US Department of Agriculture table for lycopene.<sup>8</sup>

**eFigure 1. Relation between risk of ALS and quintiles of nutrient intake.**

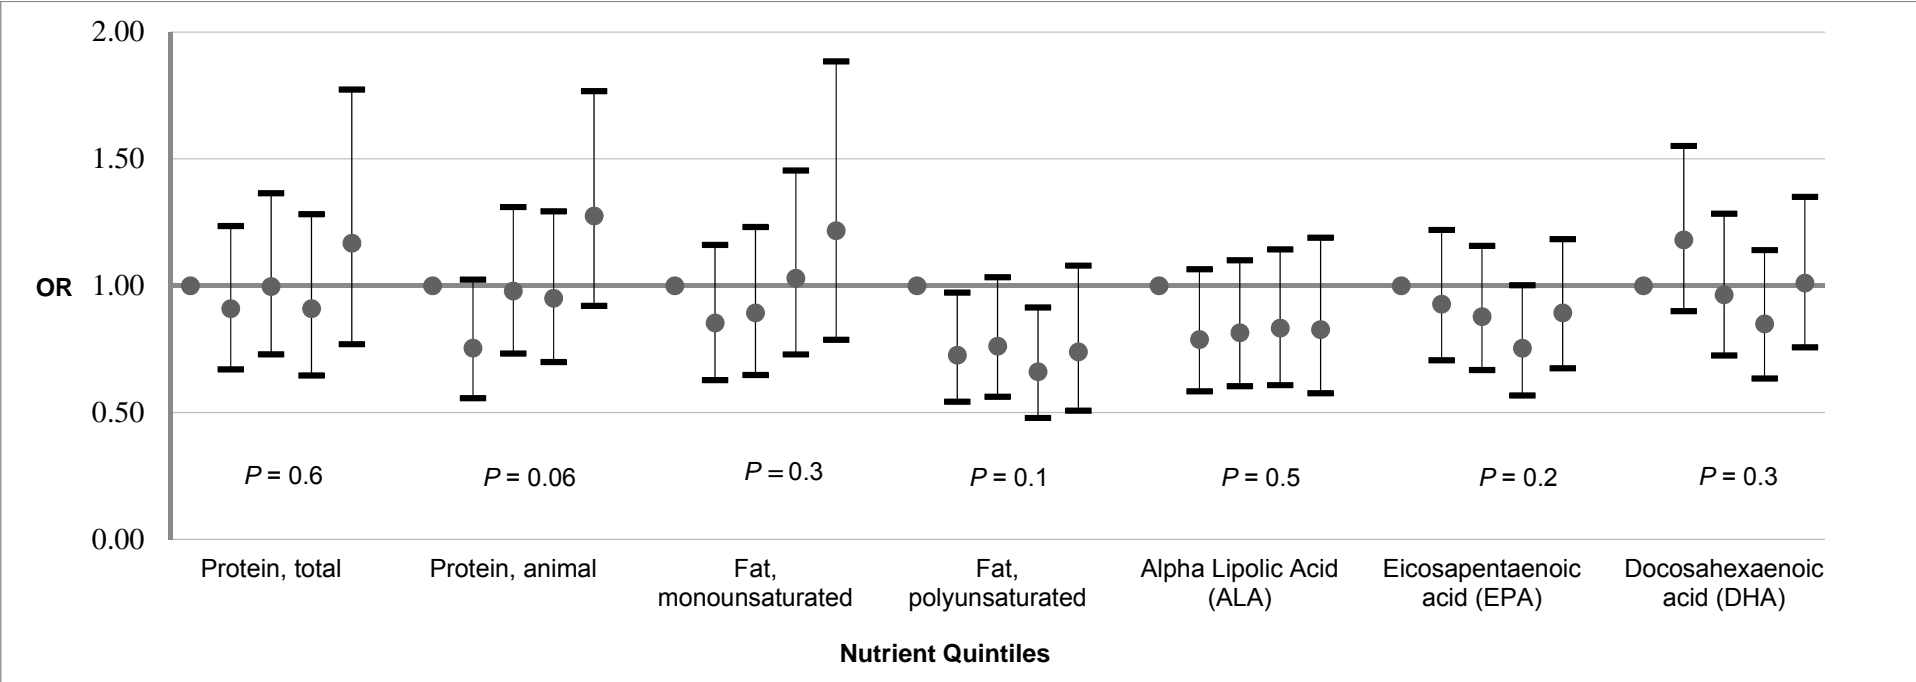

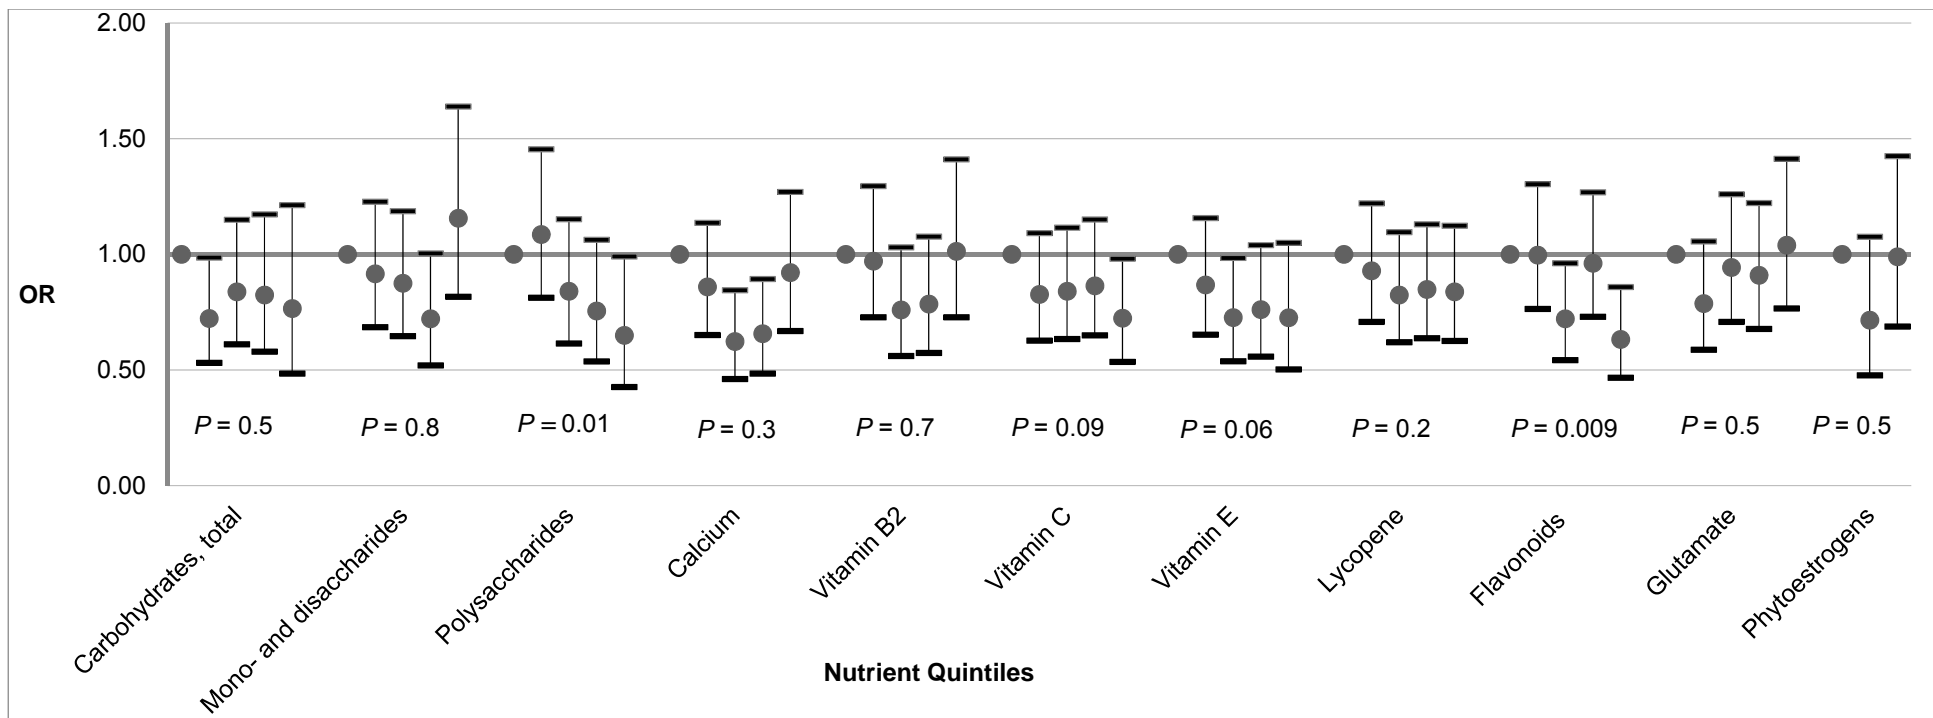

Odds ratios for the relationship between ALS and quintiles of nutrient intake. Adjusted for energy intake, age (at onset in patients; at questionnaire in controls), gender, BMI, education, current smoking, and lifetime physical activity.

**eFigure 2. Relation between risk of ALS and quintiles of alcohol intake, adjusted for intake of red wine.**

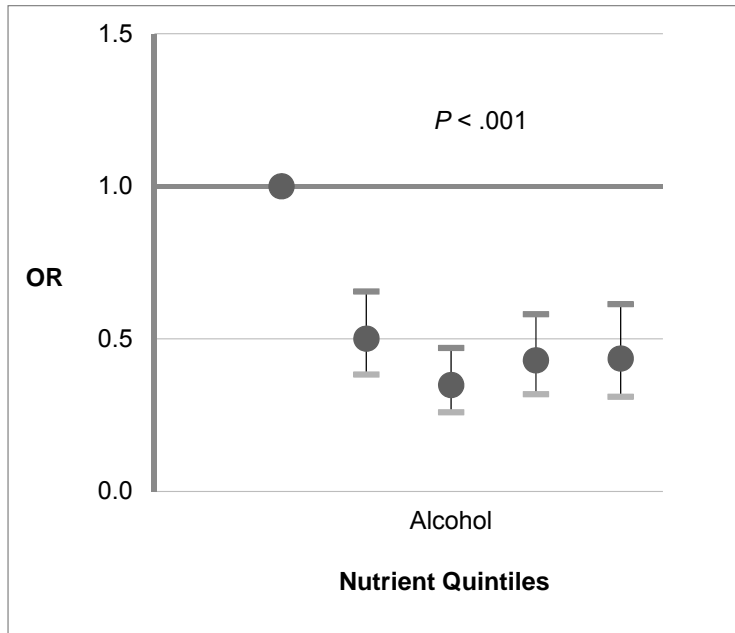

Odds ratios for the relationship between ALS and quintiles of alcohol intake. Adjusted for energy intake, age (at onset in patients; at questionnaire in controls), gender, BMI, education, current smoking, lifetime physical activity, and intake of red wine.

**eTable. Relation between nutrient intake and survival.**

| <b>Nutrient</b>             | <b>Hazard ratio<sup>a</sup><br/>(95% CI)</b> | <b>P value</b> |
|-----------------------------|----------------------------------------------|----------------|
| Protein, total              | 1.01 (0.97-1.05)                             | .81            |
| Vegetable                   | 0.95 (0.89-1.03)                             | .21            |
| Animal                      | 1.02 (0.98-1.06)                             | .34            |
| Fat, total                  | 1.01 (1.00-1.03)                             | .12            |
| Saturated                   | 1.02 (0.99-1.05)                             | .17            |
| Monounsaturated             | 1.02 (0.99-1.06)                             | .23            |
| Polyunsaturated             | 1.02 (0.98-1.06)                             | .39            |
| Alpha Lipolic Acid (ALA)    | 1.52 (0.92-2.52)                             | .10            |
| Eicosapentaenoic acid (EPA) | 0.57 (0.03-12.67)                            | .72            |
| Docosahexaenoic acid (DHA)  | 0.51 (0.05-5.45)                             | .58            |
| Omega 3 fatty acids, total  | 1.37 (0.86-2.19)                             | .19            |
| Trans fatty acids           | 1.30 (0.89-1.90)                             | .17            |
| Cholesterol                 | 1.00 (0.97-1.03)                             | .84            |
| Carbohydrates, total        | 0.99 (0.97-1.00)                             | .09            |
| Mono- and disaccharides     | 0.99 (0.98-1.01)                             | .39            |
| Polysaccharides             | 0.99 (0.97-1.01)                             | .19            |
| Fibres                      | 0.91 (0.79-1.04)                             | .16            |
| Alcohol                     | 1.00 (0.98-1.02)                             | .95            |
| Vitamins and minerals       |                                              |                |
| Calcium                     | 1.00 (1.00-1.01)                             | .32            |
| Vitamin B2                  | 1.40 (0.02-87.71)                            | .87            |
| Vitamin C                   | 0.97 (0.93-1.01)                             | .11            |
| Vitamin E                   | 1.00 (0.96-1.05)                             | .89            |
| Lycopene                    | 0.94 (0.90-0.99)                             | .02            |
| Flavonoids                  | 0.99 (0.97-1.00)                             | .07            |
| Glutamate                   | 1.00 (0.99-1.00)                             | .32            |
| Phytoestrogens              | 0.92 (0.80-1.06)                             | .24            |

Abbreviation: CI, confidence interval

<sup>a</sup> Adjusted for sex, age at onset, site of onset, premorbid BMI, energy intake, educational level, current smoking, and lifetime physical activity

<sup>b</sup> Bonferroni significant values of *P*; Bonferroni adjusted  $\alpha$ : .05/25 = .002

## References

1. Netherlands Nutrition Centre. *Zo eet Nederland, 1992: resultaten van de voedselconsumptiepeiling 1992 (in Dutch)*. (Dutch National Food Consumption Survey 1992). the Hague: Netherlands Nutrition Centre; 1993.
2. Netherlands Nutrition Centre. *Zo eet Nederland: resultaten van de Voedselconsumptiepeiling 1997-1998. (in Dutch)*. (Dutch National Food Consumption Survey 1997-1998). the Hague: Netherlands Nutrition Centre; 1998.
3. Feunekes GI, Van Staveren WA, de Vries JH, Burema J, Hautvast JG. Relative and biomarker-based validity of a food-frequency questionnaire estimating intake of fats and cholesterol. *Am J Clin Nutr*. 1993;58(4):489-496.
4. van der Heijden L. Maten, gewichten en codenummers 2003. In: *Informatorium voor Voeding en Diëtetiek: voedingsleer*. Houten: Bohn Stafleu van Loghum; 2013;732-735.
5. Stichting Nederlands Voedingsstoffenbestand. *NEVO-tabel: Nederlands Voedingsstoffenbestand 2006 (in Dutch)*. (Dutch Food Composition Database 2006). The Hague: Netherlands Nutrition Centre; 2006.
6. Hertog MGL, Hollman PCH, Katan MB, Kromhout D. Intake of potentially anticarcinogenic flavonoids and their determinants in adults in the Netherlands. *Nutr Cancer*. 1993;20(1):21-29.
7. Hertog MGL, Feskens EJM, Kromhout D et al. Dietary antioxidant flavonoids and risk of coronary heart disease: the Zutphen Elderly Study. *The Lancet*. 1993;342(8878):1007-1011.
8. USDA-Iowa State University Database. USDA database for the isoflavone content of selected foods, release 2.0. [http://www.ars.usda.gov/SP2UserFiles/Place/80400525/Data/isoflav/Isoflav\\_R2.pdf](http://www.ars.usda.gov/SP2UserFiles/Place/80400525/Data/isoflav/Isoflav_R2.pdf). Accessed June 9, 2012.
9. Rhodes J, Titherley AC, Norman JA, Wood R, Lord DW. A survey of the monosodium glutamate content of foods and an estimation of the dietary intake of monosodium glutamate. *Food Addit Contam*. 1991;8(5):663-672.
10. Lölliger J. Function and Importance of Glutamate for Savory Foods. *J Nutr*. 2000;130(4S Suppl):915S-920S.
11. Skurray GR, Pucar N. I-glutamic acid content of fresh and processed foods. *Food Chem*. 1988;27(3):177-180.
12. Yamaguchi S, Ninomiya K. Umami and Food Palatability. *J Nutr*. 2000;130(4S Suppl):921S-926S.
13. The Glutamate Association. Glutamate content of foods. <http://www.msgfacts.com/chart.html.2000>. Accessed June 5, 2012
